# Supplementary material for: Leveraging Accelerometry as a Prognostic Indicator for Increase in Opioid Withdrawal Symptoms
Source: MDPI journal article supplement (doi:10.3390/bios12110924), 2022-10-26
Supplement: s1 [file s1]

# Leveraging Accelerometry as a Prognostic Indicator for Increase in Opioid Withdrawal Symptoms

## Supplementary Material

**Table S1. Patient Demographics and Study Details**

| Participant Number | Age [y] | Sex [F/M] | Race and Ethnicity | Education [y] | Employment Status | Marital Status | Drugs Used                                                                    | ΔCOWS Scores | Sinusoidal or Non-Sinusoidal | MHD <sup>a</sup> (Excluding D/A <sup>b</sup> Use) | Study Location |
|--------------------|---------|-----------|--------------------|---------------|-------------------|----------------|-------------------------------------------------------------------------------|--------------|------------------------------|---------------------------------------------------|----------------|
| 1                  | 27      | F         | White              | 14            | Full Time         | Never Married  | oxycodone, heroin                                                             | 3            | Sinusoidal                   | DD <sup>c</sup> , PTSD, ADHD                      | Emory          |
| 2                  | 52      | M         | Black              | 14            | Full Time         | Married        | Oxycodone                                                                     | -2           | Non-Sinusoidal               | N/A <sup>*d</sup>                                 | Emory          |
| 3                  | 37      | M         | White              | 12            | Full Time         | Married        | DNR                                                                           | -2           | Non-Sinusoidal               | DNR <sup>e</sup>                                  | Emory          |
| 4                  | 35      | M         | Hispanic           | 12            | Full Time         | Never Married  | Cannabis, heroin                                                              | 8            | Sinusoidal                   | DD                                                | Alliance       |
| 5                  | 34      | F         | Black              | 12            | Unemployed        | Never Married  | Oxycodone                                                                     | 3            | Sinusoidal                   | DD                                                | Emory          |
| 6                  | 52      | M         | White              | 8             | Unemployed        | Never Married  | Heroin, cocaine                                                               | 7            | Non-Sinusoidal               | N/A <sup>*</sup>                                  | Emory          |
| 7                  | 31      | F         | White              | 12            | Unemployed        | Married        | Marijuana, Adderall, methamphetamine, oxycodone                               | -4           | Non-Sinusoidal               | DD                                                | Emory          |
| 8                  | 27      | F         | Asian              | 12            | Unemployed        | Never Married  | Marijuana, oxycodone                                                          | 6            | Sinusoidal                   | DD                                                | Emory          |
| 9                  | 37      | F         | Black              | 12            | Disabled          | Divorced       | Oxycodone                                                                     | -6           | Non-Sinusoidal               | DD, PTSD                                          | Emory          |
| 10                 | 24      | M         | Asian              | 12            | Full Time         | Never Married  | Sedatives, Marijuana, Oxycodone, Mushroom, Kratom                             | 0            | Non-Sinusoidal               | DD                                                | Emory          |
| 11                 | 32      | M         | Hispanic           | 12            | Part Time         | Never Married  | Heroin, Marijuana, Amphetamine, Adderall, Methamphetamine, Cocaine, Sedatives | -1           | Sinusoidal                   | DD                                                | Emory          |

|    |    |   |          |     |            |               |                                             |    |                |                     |          |
|----|----|---|----------|-----|------------|---------------|---------------------------------------------|----|----------------|---------------------|----------|
| 12 | 23 | M | Black    | 12  | Part Time  | Never Married | Marijuana, Amphetamine, Adderall, Oxycodone | 2  | Sinusoidal     | DD, ADHD            | Alliance |
| 13 | 29 | M | Black    | 12  | N/A        | Never Married | DNR                                         | 1  | Non-Sinusoidal | DNR                 | Alliance |
| 14 | 29 | M | Black    | 12  | Full Time  | Never Married | DNR                                         | -1 | Non-Sinusoidal | DNR                 | Alliance |
| 15 | 28 | M | White    | 12  | Unemployed | Never Married | DNR                                         | 2  | Sinusoidal     | DNR                 | Alliance |
| 16 | 27 | F | Hispanic | 12  | Student    | Never Married | DNR                                         | 1  | Non-Sinusoidal | DNR                 | Alliance |
| 17 | 27 | M | White    | N/A | N/A        | Never Married | DNR                                         | 9  | Non-Sinusoidal | DNR                 | Alliance |
| 18 | 47 | M | White    | 12  | Part Time  | Married       | DNR                                         | 1  | Non-Sinusoidal | DNR                 | Emory    |
| 19 | 59 | M | White    | 14  | Disabled   | Never Married | DNR                                         | 0  | Non-Sinusoidal | DNR                 | Alliance |
| 20 | 52 | M | Black    | 12  | Disabled   | Married       | Sedatives, marijuana, heroin, Xanax         | -1 | Sinusoidal     | DD, PD <sup>§</sup> | Alliance |
| 21 | 34 | M | White    | 12  | Part Time  | Never Married | DNR                                         | 1  | Non-Sinusoidal | DNR                 | Emory    |

\*Participants 2 and 6 did not have any recorded non-opioid related mental disorders.

<sup>a</sup> MHD = Mental Health Disorders

<sup>b</sup> D/A= Drug and Alcohol Use

<sup>c</sup> DD = Depressive Disorders (All Cause)

<sup>d</sup> N/A = Not Available

<sup>e</sup> DNR = Data Not Recorded

<sup>§</sup> PD = Panic Disorder
